# Supplementary material for: Midwinter melts in the Canadian prairies: energy balance and hydrological effects
Source: Copernicus journal article supplement (doi:10.5194/hess-23-1867-2019), 2019-04-04
Supplement: Supplementary file 1 [file hess-23-1867-2019-supplement.zip]

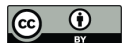

*Supplement of*

## **Midwinter melts in the Canadian prairies: energy balance and hydrological effects**

**Igor Pavlovskii et al.**

*Correspondence to:* Igor Pavlovskii ([ipavlovs@ucalgary.ca](mailto:ipavlovs@ucalgary.ca))

- [hess-23-1867-2019-supplement-title-page.pdf](#)
- [Supplementary material.xlsx](#)

The copyright of individual parts of the supplement might differ from the CC BY 4.0 License.
